1 **THz irradiation inhibits cell division by**  
2 **affecting actin dynamics**

3

4

5 Shota Yamazaki<sup>1\*</sup>, Yuya Ueno<sup>2</sup>, Ryosuke Hosoki<sup>2</sup>, Takanori Saito<sup>2</sup>,  
6 Toshitaka Idehara<sup>3</sup>, Yuusuke Yamaguchi<sup>3</sup>, Chiko Otani<sup>1</sup>, Yuichi Ogawa<sup>4</sup>,  
7 Masahiko Harata<sup>2\*</sup>, Hiromichi Hoshina<sup>1\*</sup>

8

9

10 <sup>1</sup> Terahertz Sensing and Imaging Research Team, RIKEN Center for  
11 Advanced Photonics, 519-1399 Aramaki-Aoba, Aoba-ku, Sendai, Miyagi  
12 980-0845, Japan.

13

14 <sup>2</sup> Laboratory of Molecular Biology, Graduate School of Agricultural Science,  
15 Tohoku University, 468-1 Aramaki-Aoba, Aoba-ku, Sendai, Miyagi 980-  
16 0845, Japan.

17

18 <sup>3</sup> Research Center for Development of Far-Infrared Region, University of  
19 Fukui (FIR UF), Bunkyo 3-9-1, Fukui 910-8507, Japan.

20

21 <sup>4</sup> Laboratory of Bio-Sensing Engineering, Graduate School of Agriculture,  
22 Kyoto University, Kitashirakawa-Oiwakecho, Sakyo-ku, Kyoto 606-8502,  
23 Japan.

24

25 \*Corresponding authors: correspondence should be addressed to  
26 shota.yamazaki.fc@riken.jp, masahiko.harata.b6@tohoku.ac.jp,  
27 hoshina@riken.jp

28

29

30

## 31 Abstract

32 Biological phenomena induced by terahertz (THz) irradiation are described in recent  
33 reports, but underlying mechanisms, structural and dynamical change of specific molecules are  
34 still unclear. In this paper, we performed time-lapse morphological analysis of human cells and  
35 found that THz irradiation halts cell division at cytokinesis. At the end of cytokinesis, the  
36 contractile ring, which consists of filamentous actin (F-actin), needs to disappear; however, it  
37 remained for 1 hour under THz irradiation. Induction of the functional structures of F-actin was  
38 also observed in interphase cells. Similar phenomena were also observed under chemical  
39 treatment (jasplakinolide), indicating that THz irradiation assists actin polymerization. We  
40 previously reported that THz irradiation enhances the polymerization of purified actin in vitro;  
41 our current work shows that it increases cytoplasmic F-actin in vivo. Thus, we identified one  
42 of the key biomechanisms affected by THz waves.

43

## 44 Introduction

45 The recently developed technology of terahertz (THz) light sources indicate the bloom  
46 of applications in a wide range of fields, such as chemical sensing [1,2], security imaging  
47 motion sensing [3–6], and telecommunications [7–12]. For example, in the wireless technology  
48 "6G" aiming for practical use in the 2030s, the use of sub-THz electromagnetic waves is being  
49 studied. The use of the "sub-THz" is also being considered for the acquisition of high-precision  
50 position information in radars required for autonomous driving and motion sensors. Over the  
51 next decades, THz light sources will become miniaturized, powerful, cheap, and familiar to  
52 everyday life. To facilitate such practical THz applications, the safety of THz radiation for  
53 human health must be guaranteed [13].

54 The interaction between THz radiation and biological systems has been previously  
55 investigated. Two projects, the European THz-BRIDGE and the International EMF project in  
56 the SCENIHR [14], summarize recent studies about the biological effects of THz radiation. For  
57 example, THz irradiation was shown to inhibit cell proliferation and to change the adhesive  
58 properties of the nerve cell membrane [15,16]. Other studies showed THz-induced DNA  
59 destabilization [17–19], which causes chromosomal aberrations in human lymphocytes [20].  
60 The transcriptional activation of wound-responsive genes in mouse skin [21] and the induction  
61 of DNA damage in an artificial human 3D skin tissue model [22] were also reported as effects  
62 of THz irradiation. However, the mechanisms are still unclear because such phenomenological  
63 studies cannot reveal the underlying molecular origin in the complex biological systems.

64 An important point to consider for THz irradiation experiments is the THz radiation  
65 source itself. The THz power density must not be too high to avoid detrimental thermal effects  
66 on the sample. Many studies have shown the effect of heating on cells, such as tissue damage  
67 [23,24], heat-induced cellular death [25,26], and DNA damage [27,28]. Thus, the THz beam  
68 should not be focused tightly to prevent an increase in the temperature on the sample. Two  
69 studies have shown that millimeter-wave radiation induces specific cellular responses that  
70 differ from direct thermal effects (29, 30); however, the underlying mechanism and exact  
71 targets are poorly defined. In addition to the effect of heating, the generation of the acoustic  
72 waves in aqueous solution must be considered when using the pulsed THz sources. In our  
73 previous works, we observed that THz pulses generate shockwaves at the surface of liquid  
74 water [31]. The generated shockwaves propagate to a depth of several millimeters, and disrupt  
75 protein structures in living cells [32]. To avoid such acoustic effects, the peak power of the THz  
76 pulses should be kept at a sufficiently low level.

77 In this study, we investigated the “non-thermal” and “non-acoustic” effects of THz  
78 irradiation on the morphology of living HeLa cells. The energy of THz was 6 mJ/cm<sup>2</sup> with a  
79 duration of 10 ms, giving a peak power less than 0.6 W/cm<sup>2</sup>, which is eight orders of magnitude  
80 smaller than that in our previous studies [32]. The THz fluence was low enough to keep the  
81 temperature rise less than 0.2 °C during irradiation. Morphological observation showed that  
82 cell division in the cell cycle is arrested at mitosis during THz irradiation. Fluorescence  
83 microscopy revealed that this phenomenon is due to the stabilizing of the contractile ring, which  
84 is required to disappear to complete the cytokinesis — the last step of cell division. We found  
85 that the contractile ring was stabilized because of the enhancement of actin polymerization by  
86 THz irradiation. This work is the first to identify the key molecule and mechanism by which  
87 THz waves affect biological systems in a non-thermal and non-acoustic manner.

88  
89

## 90 **Materials and Methods**

### 91 **THz source**

92 We used a gyrotron (FU CW GVIB [33]) to generate 0.46-THz waves. We designed an  
93 apparatus that exposed samples to the radiation, which had a peak power density of 0.6 W/cm<sup>2</sup>.  
94 A schematic representation of the device is shown in Fig. 1A. The THz gyrotron produced 10-  
95 ms-long pulses with a 1-Hz repetition rate [34]. As a second source of THz irradiation, we used  
96 a compact solid-state device based on an IMPATT-diode (TeraSense Group Inc), which  
97 ensured coherent continuous-wave emission of THz waves with a frequency of 0.28 THz and  
98 output power of 20 mW. THz radiation was outputted from the horn antenna (4 mm × 4 mm),  
99 and emitted from the bottom of the dish without focusing the beam, and with a power density  
100 of 125 mW/cm<sup>2</sup>.

101

### 102 **THz irradiation of HeLa cells**

103 HeLa cells were seeded on 0.15 mm-thick cover glass and cultured in Dulbecco's  
104 Modified Eagle's Medium (Gibco) supplemented with 10% fetal bovine serum and antibiotics  
105 (penicillin and streptomycin) at 37 °C in a 5% CO<sub>2</sub> humidified atmosphere. Actin filaments  
106 were stained with SiR-actin by adding probes from a 1 mM dimethyl sulfoxide (DMSO) stock  
107 solution to the growth medium (final concentration: 3 μM) and incubating for 1 hour at 37 °C  
108 in a 5% CO<sub>2</sub> humidified atmosphere. The film dish was set on a heating stage (LINKAM:  
109 10002L) to maintain a culture temperature at 37 ± 1 °C. The THz beam passed vertically  
110 through a 4-mm hole in the heating stage. During THz irradiation, fluorescence microscopy  
111 images were obtained with a UV light source (Thorlabs, X-Cite 200DC lamp), dichroic mirror  
112 (Thorlabs, DMLP650R), two optical filters (excitation band pass: 625 nm/25 nm; emission long  
113 pass: 675 nm), objective lens (Olympus, LUMFLN60XW; Nikon, N10X-PF), and an sCMOS  
114 camera (Thorlabs, CS2100M-USB). Figure 1A shows a schematic diagram of the experimental  
115 setup for THz irradiation. Cells treated with 10 nM jasplakinolide in DMSO were used as a  
116 positive control.

117 For the quantitative analysis of the cells at cytokinesis, cells were synchronized at the  
118 mitotic phase using 25 μg/ml nocodazole. Cells were cultured at 16 hours after the addition of  
119 nocodazole. Before each experiment, nocodazole was washed out by changing the culture  
120 medium, and cells proceeded to mitosis with or without THz irradiation.

121 Image analysis was performed using Fiji software. To measure the mean signal intensity in  
122 the membrane compartment, the outline of each cell was selected using the area selection tools  
123 in the software. The mean signal intensity of the signal over the area of the cell was recorded.  
124 The number of cells is shown as *n*. Statistical significance was calculated using F- and T-tests.

125

## 126 **Morphological analysis**

127 To measure the cell area and perimeter, the outlines of cells were selected (in the  $x$ - $y$   
128 plane) using the area selection tools in the Fiji software. The form factors of individual cells  
129 were calculated as  $4\pi S/L^2$ , where  $S$  is the projected cell area and  $L$  is the cell perimeter. This  
130 index reflects the irregularity of the cell shape: a perfectly round cell has a value of one, and a  
131 stellate cell has a value lower than one. Data are presented as the mean  $\pm$  standard deviation.  
132 The number of cells is shown as  $n$ . Statistical significance was calculated using F- and T-tests.  
133  
134  
135

## 136 **Results**

### 137 **THz irradiation halts cell division of cultured cells**

138 To observe the non-thermal and non-acoustic effects of the THz irradiation, we irradiated  
139 living cells with a THz beam with relatively low peak power. The sample was irradiated with  
140 the output of the gyrotron (0.46 THz), without focusing the beam and with a peak power density  
141 of 0.6 W/cm<sup>2</sup>. This radiation power is eight orders of magnitude lower than the power in which  
142 acoustic waves were generated in our previous work [32]. The radiation source was pulsed with  
143 a duty ratio of 1% (10-ms duration, 1-Hz repetition rate) to reduce heating of the sample. HeLa  
144 cells were grown on a film-bottom dish, and the culture medium was kept at 37 °C by a heating  
145 stage during the experiment. THz radiation was emitted from the bottom of the culture dish for  
146 60 minutes (Fig. 1A). The high absorbance of water (160 cm<sup>-1</sup> at 21 °C, 0.46 THz) limits the  
147 penetration depth of the THz waves to about 100  $\mu$ m. Because the thickness of the cells is less  
148 than 30  $\mu$ m, THz waves reached all regions of the cell. To evaluate the effect of THz irradiation,  
149 we performed time-lapse microscopy imaging of the HeLa cells (Fig. 1B).

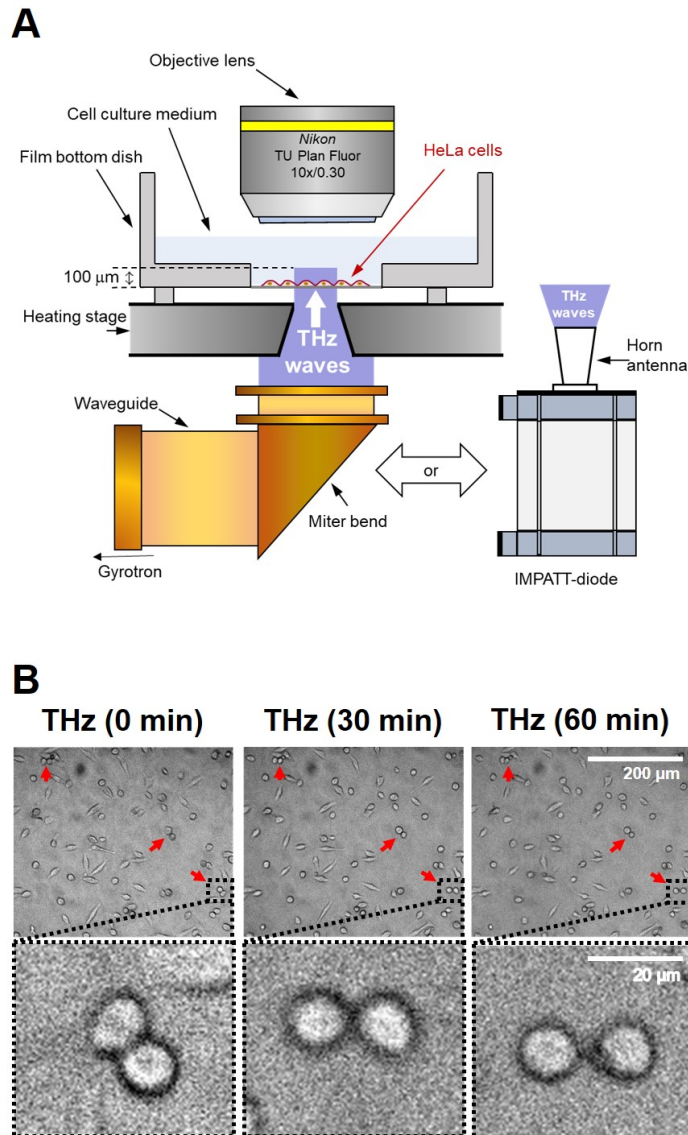

150

151 **Fig. 1. Effects of THz irradiation on cell morphology.** (A) Schematic illustration of the  
152 experimental setup. THz waves with a power density of 0.6 W/cm<sup>2</sup>, frequency of 0.46 THz,  
153 pulse duration of 10 ms, and a repetition rate of 1 Hz were generated by a gyrotron at FIR-UF.  
154 The THz beam passed vertically from the bottom of the dish via an aperture of 4 mm in the  
155 heating stage. As a second source of THz irradiation, we used an IMPATT-diode which ensured  
156 coherent continuous-wave emission of THz waves with a frequency of 0.28 THz and output  
157 power of 20 mW. THz radiation was outputted from the horn antenna with a power density of  
158 125 mW/cm<sup>2</sup>. HeLa cells were seeded on the film bottom dish and cultured for 24 hours before  
159 the experiments. The culture medium was kept at 37 °C by the heating stage during the  
160 experiments. (B) Microscopy images of cells at 0, 30, and 60 minutes. Irradiation was started at  
161 0 minutes and continued for 60 minutes. The bottom panels show the magnified images of the  
162 black squares in the upper panels. The red arrows indicate a pair of cells with a round shape. The  
163 scale bar represents 200  $\mu\text{m}$  (upper panel) and 20  $\mu\text{m}$  (bottom panel).

164

165 Under THz irradiation, the appearance of a characteristic form of cells, which consists of  
166 a pair of round cells, was frequently observed (Fig. 1B, red arrow), and the characteristic cells  
167 are maintained during THz irradiation up to 60 min (Fig. 1B, bottom panel (zoomed images)).  
168 The round shape of the cells is a typical morphology of mitotic cells, and the pairing of two  
169 round cells is observed at the last step of mitosis, called cytokinesis (Fig. 2A). Cytokinesis is  
170 generally completed within 15 minutes [35]. Therefore, the persistence of the paired round cells  
171 indicates that THz irradiation inhibited the progression of cytokinesis.

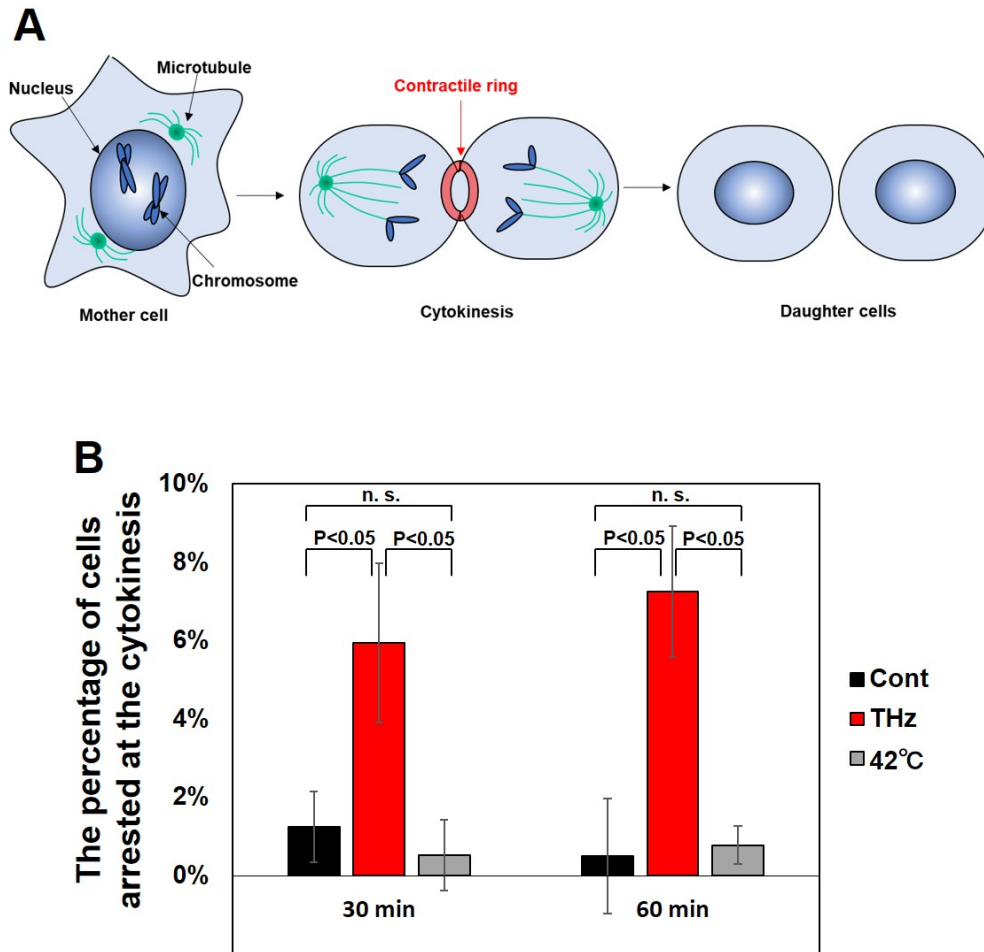

172  
173 **Fig. 2. THz irradiation halts cytokinesis.** (A) Schematic representation of mitotic progression.  
174 In the process of mitosis, actin polymerization is induced to make the contractile ring, which is  
175 required for starting the division of the mother cell into two daughter cells. Then, the contractile  
176 ring is squeezed and completes cell division. Cytokinesis is generally completed within 15  
177 minutes. (B) Percentage of cells arrested at cytokinesis. The cell cycle was synchronized to the  
178 mitosis phase with 25  $\mu\text{g/ml}$  nocodazole before each experiment. Nocodazole interferes with the  
179 polymerization of microtubules and arrests the initial step of mitosis. Cells were determined to  
180 be arrested at cytokinesis when the contractile ring was retained for more than 30 minutes after  
181 the release from nocodazole. The error bars show the standard deviation of three independent  
182 experiments. More than 184 cells were measured in each experiment.

183

184 For the quantitative evaluation of the arrested cells at cytokinesis, cells were  
185 synchronized at the initial phase of mitosis using 25  $\mu\text{g/ml}$  nocodazole, and released into the

186 culture medium without nocodazole to proceed with the mitosis. Figure 2B shows the  
187 percentage of cells arrested at cytokinesis. Whereas cytokinetic-arrested cells are not observed  
188 under the control condition, THz irradiation induced cytokinetic arrest at 30 minutes after  
189 nocodazole release and the arrest was further continued (Fig. 2B, THz). We also analyzed the  
190 effect of heat on the progression of cytokinesis. The culture medium was kept at 42 °C by the  
191 heating stage during the progression of mitosis; however, this did not increase the number of  
192 cells arrested at cytokinesis (Fig. 2B, 42 °C). Since the temperature rise during THz irradiation  
193 was less than 0.2 °C (Supplemental Fig. S1), some other reasons than the temperature increase  
194 are supposed for the inhibition of cytokinesis.

195

## 196 **Persistence of the contractile ring during THz** 197 **irradiation**

198 The dominant regulator of cytokinesis is the contractile ring, which consists of actin  
199 filaments (Fig. 2A) [36]. At the start of cytokinesis, a G (globular)- to F (filamentous)-actin  
200 transition is induced to make the contractile ring (polymerization reaction). Then, the opposite  
201 transition of F- to G-actin disassembles the contractile ring to complete cell division  
202 (depolymerization reaction). After THz irradiation, the percentage of cells arrested at  
203 cytokinesis significantly increased in comparison with control cells (Fig. 2B), suggesting that  
204 THz irradiation affects the disassembly of the contractile ring.

205 To observe the behavior of the contractile ring under THz irradiation, we stained actin  
206 filaments in living cells with SiR-actin [37], and performed time-lapse imaging under a  
207 fluorescence microscope. The formation of the contractile ring was observed with and without  
208 THz irradiation (Fig. 3, Cytokinesis, red arrow). Without THz irradiation, the contractile ring  
209 disappeared after 30 minutes, and the two daughter cells separated completely (Fig. 3, Control,  
210 white arrows). By contrast, under THz irradiation, the contractile ring remained for at least 30  
211 minutes (Fig. 3, THz, 30 min later). In cells cultured at 42 °C, the contractile ring disappeared,  
212 and cell division was completed within 30 minutes (Fig. 3, 42 °C, 30 min later). This result  
213 suggests that the depolymerization reaction of actin progresses in a non-thermal manner.  
214 Cytokinesis is generally completed within 15 minutes, and the dynamic turnover of actin  
215 filaments to G-actin is required for its completion [38–41]. Importantly, the chemical induction  
216 of actin polymerization with jasplakinolide inhibits the completion of cytokinesis by stabilizing  
217 the contractile ring [42]. Taken together, these results support the notion that THz irradiation  
218 inhibits the completion of cytokinesis by affecting the actin dynamics.

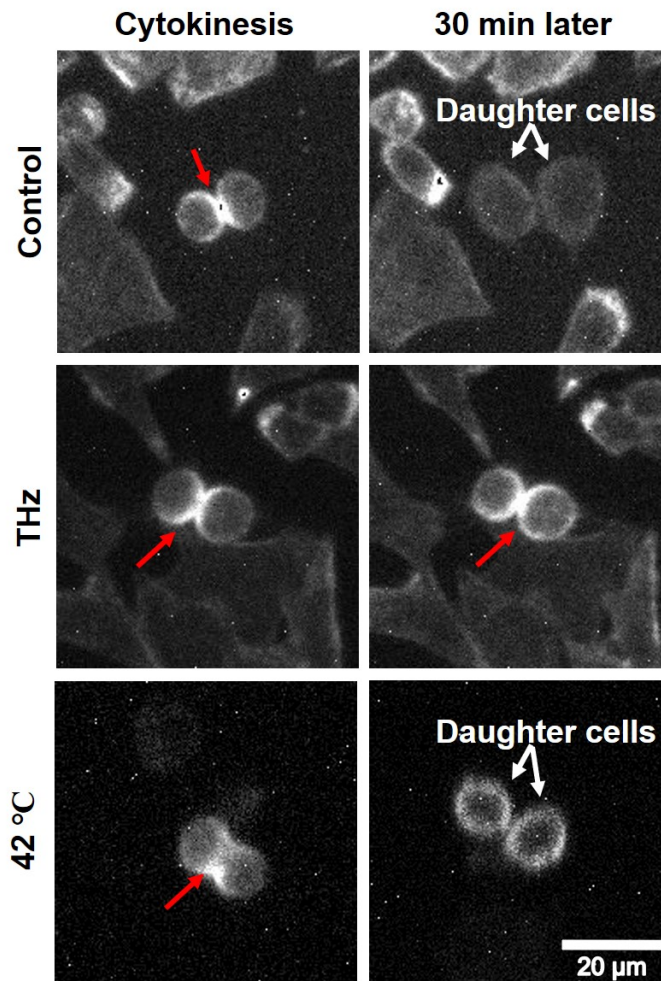

219

220

221

222

223

224

225

226

227

228

## Effects of THz irradiation on actin filaments inside cells

229

230

231

232

233

234

235

236

237

Actin filaments are relevant to various cellular functions, and their dynamics are tightly regulated. For example, cytoplasmic actin polymerization in the plasma membrane is an essential and versatile process that defines the cellular shape and confers mobility to cells. To evaluate the effects of THz irradiation on the actin dynamics observed in living cells, we stained actin filaments in living HeLa cells with SiR-actin [37], and performed time-lapse imaging with fluorescence microscopy. The fluctuation of the cellular actin filaments can be quantitatively estimated by the fluorescence intensity of SiR-actin, which increases up to 100-fold in the actin filaments. Cells treated with 10 nM jasplakinolide, which induce actin polymerization, were also analyzed as a positive control.



238           As Figure 4A shows, most cells stayed adherent during the 60-minute observation period,  
239 with a few cells detaching from the bottom of the dish. In addition, the area of the cells remained  
240 constant for 60 minutes during both THz irradiation and jasplakinolide treatment (Supplemental  
241 Fig. S2), suggesting that abnormal shape changes, such as atrophy and hypertrophy, did not  
242 occur. Figure 4B shows the mean fluorescence intensity of SiR-actin in individual cells at 0,  
243 30, and 60 minutes. The box plot shows the mean fluorescence intensity of SiR-actin in the  
244 cells, and the error bar represents the standard deviation. The fluorescence intensities of SiR-  
245 actin in the cells were kept constant for 60 minutes in the control experiment (Fig. 4B, control),  
246 showing that fluorescence bleaching did not occur during the observation period. After 60  
247 minutes of THz irradiation, the fluorescence intensity of SiR-actin increased, indicating that  
248 actin polymerization was accelerated and the number of filaments increased inside the cells  
249 (Fig. 4B, THz). A similar effect was observed for the ‘chemical’ induction of actin  
250 filamentation using jasplakinolide (Fig. 4B, Jasplakinolide). These results show that THz  
251 irradiation accelerates actin filamentation in living HeLa cells.

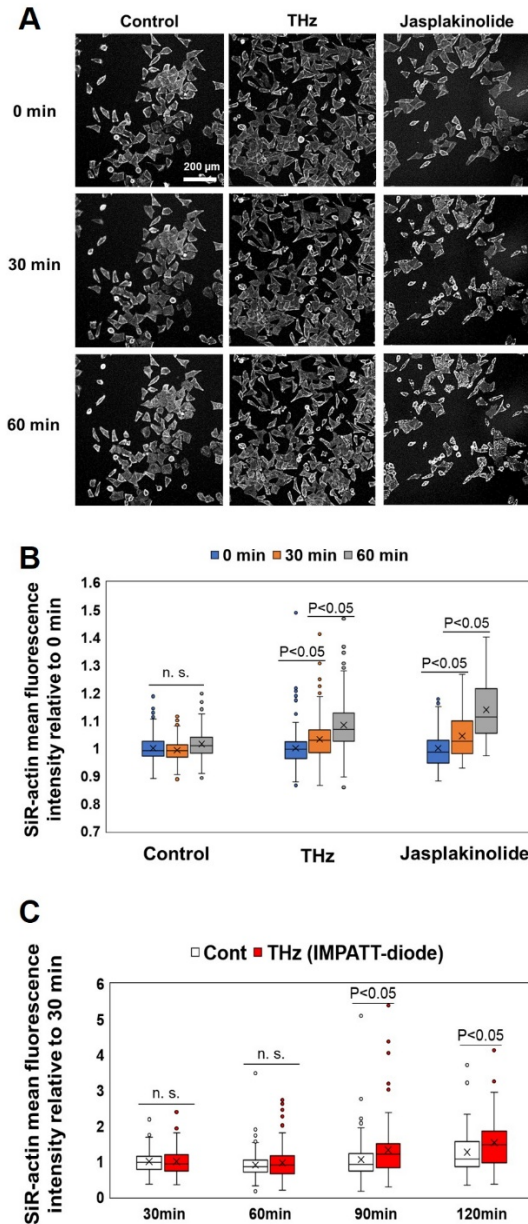

**Fig. 4. THz waves enhance actin polymerization in cells.** (A) Fluorescence microscopy images of cells stained with SiR-actin at 0, 30, and 60 minutes. THz irradiation was started at 0 minutes and continued for 60 minutes. As a positive control, cells were treated with 10 nM jasplakinolide at 0 minutes to induce actin polymerization. The white bar shows a scale of 200  $\mu\text{m}$ . (B) Mean fluorescence intensity of SiR-actin in individual cells measured from the fluorescence microscopy images. The box plot shows the mean value relative to 0 minutes. The standard deviations of three independent experiments are shown. More than 77 cells were measured in each experiment. (C) Irradiation with THz waves generated by the IMPATT-diode source was started at 0 minutes and continued for 120 minutes. The mean fluorescence intensity of SiR-actin in individual cells was measured from the fluorescence microscopy images. The box plot shows the mean value relative to that measured at 30 minutes. The standard deviations of three independent experiments are shown. More than 120 cells were measured in each experiment.

252  
253  
254  
255  
256  
257  
258  
259  
260  
261  
262  
263  
264  
265

266

267 To confirm the THz irradiation effect by another type of radiation source, same  
268 experiment was performed by a solid-state semiconductor device (TeraSense: IMPATT diode),  
269 which outputs continuous-wave at 0.28 THz with a power of 20 mW. THz wave was emitted  
270 from the diagonal horn antenna with a size of 4 mm × 4 mm, attached at the bottom of the film-  
271 bottom dish (Fig. 1A). The irradiation power density was about 125 mW/cm<sup>2</sup>. Figure 4C shows  
272 the mean fluorescence intensity of SiR-actin in the individual cells at 30, 60, 90, and 120  
273 minutes. After 90 minutes of irradiation, the fluorescence intensity of SiR-actin was  
274 significantly increased compared with the control cells (Fig. 4C, THz).

275 The fluorescence intensity under irradiation from the IMPATT diode increased more  
276 slowly than under gyrotron irradiation because of the different parameters of the two light  
277 sources. Specifically, the peak power of the IMPATT diode (125 mW/cm<sup>2</sup>) was about five  
278 times lower than that of the gyrotron (600 mW/cm<sup>2</sup>). Moreover, the frequency of the IMPATT  
279 diode (0.28 THz) was much lower than that of the gyrotron (0.46 THz). At present, we do not  
280 know which of these two parameters controls the speed of actin filamentation. We note that the  
281 average energy flux of the IMPATT diode (125 mJ/cm<sup>2</sup>/s) was higher than that of the gyrotron  
282 (6 mJ/cm<sup>2</sup>/s). However, the speed of actin filamentation does not depend on the average energy  
283 flux.

284

## 285 **Effects of THz irradiation on actin-including structures** 286 **in interphase cells**

287 In addition to the formation of the contractile ring in cytokinesis, actin polymerization is  
288 required for forming cellular structures in interphase cells, including stress fibers, lamellipodial  
289 meshworks, and transverse arcs (Fig. 5A). Stress fibers exist along the cell membrane and form  
290 the cytoskeleton, which maintains the cell shape. Lamellipodial meshworks are observed at the  
291 leading edge of cells and are required for cell migration. Transverse arcs are generated in the  
292 peripheral regions of the cell membrane and move to the center of the cell [43]; this movement  
293 is generally the initial step of cell migration, and actin polymerization is required for movement.  
294 To analyze the effect of THz irradiation on actin polymerization, we analyzed actin-including  
295 structures in living cells using fluorescent microscopy. Note that we did not observe any change  
296 of lamellipodial meshworks in this study. It is known that the production of lamellipodial  
297 meshworks induces the reorganization of the cell into an asymmetric shape. To confirm the  
298 cellular shape transition, we analyzed the form factor, which is close to 1 for a round shape,  
299 and close to 0 for an asymmetric shape [44]. The form factor was the same for the control, THz  
300 irradiation, and jasplakinolide-treated samples for 60 minutes (Supplemental Fig. S3).  
301 Therefore, we concluded that lamellipodial meshworks were not induced by the 60-minute THz  
302 irradiation.

303

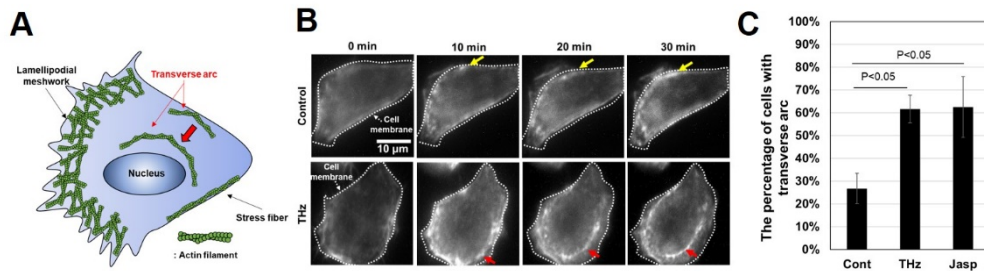

304 **Figure 5. Effect of THz irradiation on actin-including structures.** (A) Illustration of the  
305 functional structures that include actin filaments inside cells. In the cytoplasm, actin filaments  
306 form massive assemblies, which can be categorized as stress fibers, lamellipodial meshworks,  
307 and transverse arcs. Stress fibers are static structures that exist along the cell membrane; the  
308 lamellipodial meshwork is observed in the leading edge of the cell; and transverse arcs are  
309 generated in the cell membrane and move to the center of the cell. (B) Live-cell imaging of actin  
310 filaments with and without THz irradiation. The white dotted line marks the cell membrane. The  
311 yellow arrow shows stress fibers, which appeared along the cell membrane. The red arrow shows  
312 a transverse arc, which was generated in the cell membrane and moved to the center of the cell  
313 for 20–30 minutes. The scale bar represents 10  $\mu\text{m}$ . (C) Percentage of cells, in which transverse  
314 arcs appeared during microscopy observation for 30 minutes. As a positive control, cells were  
315 treated with 10 nM jasplakinolide at 0 minutes to induce actin polymerization. The error bar  
316 shows the standard deviation of three independent experiments. More than 184 cells were  
317 measured in each experiment.

318

319 Figure 5B shows time-lapse images of a single cell stained with SiR-actin at 0, 10, 20,  
320 and 30 minutes. The white dotted lines show the position of the cell membrane. The  
321 fluorescence intensity of SiR-actin increased near the cell membrane in the control, indicating  
322 that stress fibers were generated during the measurement (Fig. 5B, Control, yellow arrows).  
323 Under THz irradiation, in addition to the stress fiber formation, transverse arcs were formed in  
324 the periphery, and this structure moves from the cell membrane towards the center of the cell  
325 (Fig. 5B, THz, red arrows) (Supplemental Movie. S1).

326 Figure 5C shows the number of cells in which transverse arcs were generated during the  
327 30-minute experiment. 27% of cells contained a transverse arc in the control experiment (Fig.  
328 5C, Cont). By contrast, over 60% of the cells contained a transverse arc as a result of either  
329 THz irradiation or jasplakinolide treatment (Fig. 5C, THz and Jasp). These results suggest that  
330 THz irradiation affects actin polymerization not only in the contractile ring but also in the  
331 cytoplasm of interphase cells.  
332

## 333 Discussion

334 In our previous study, we subjected an aqueous solution of purified actin protein to THz  
335 irradiation for the purpose of developing a physical technique for macromolecular manipulation  
336 [34]. In that study, we found that actin filaments were generated effectively under THz  
337 irradiation in living cells. Furthermore, THz irradiation caused the generation and retention of  
338 massive assemblies of actin filaments, such as contractile rings and transverse arcs (Figs 3 and  
339 5).

340 Because the formation of biological molecules is sensitive to temperature, the simplest  
341 explanation for the enhancement of actin polymerization might be a transient increase of  
342 temperature owing to the absorption of THz irradiation by water. However, it has been  
343 demonstrated that the effect of a temperature rise on actin polymerization is negligible (Fig.  
344 2B) [34,45]. In addition, we estimated the temperature change during THz irradiation as 0.23  
345  $^{\circ}\text{C}$  using an adiabatic model (Supplemental Fig. S1). Therefore, it is unlikely that a temperature  
346 change due to THz irradiation enhances actin polymerization in living cells, and other  
347 mechanisms should be considered.

348 Another possible explanation is THz-induced shockwaves. In our previous study, we  
349 found that shockwaves were generated by THz pulses of 80  $\mu\text{J}/\text{cm}^2$  with a duration of 5 ps  
350 (peak power of 16  $\text{MW}/\text{cm}^2$ ) [32]. Intense THz pulses are absorbed at the water surface and the  
351 energy concentration results in shockwave generation. The shockwaves propagate for a few  
352 millimeters in the aqueous medium, and disrupt the morphology of actin filaments in living  
353 cells. However, in the present study, the energy of each THz pulse was 6  $\text{mJ}/\text{cm}^2$  with a duration

354 of 10 ms, giving a peak power of just 0.6 W/cm<sup>2</sup>, which is eight orders of magnitude smaller  
355 than that used in Ref. 32, which generated shockwaves. Therefore, we consider that THz  
356 irradiation did not induce shockwaves under the experimental conditions of the present study.

357 We attribute the observed phenomena to non-thermal and non-acoustic effects of THz  
358 irradiation (i.e. the direct interaction between THz photons and the dynamical motion of the  
359 actin proteins). Because the vibration frequencies of the higher-order conformations of proteins  
360 and the surrounding water molecules are in the THz band [46–48], THz irradiation perturbs  
361 the intra- and inter-molecular dynamics of the actin proteins. The actin polymerization process  
362 consists of three phases: nucleation, elongation, and equilibrium. In our previous study, we  
363 found that THz irradiation enhances actin polymerization reaction in the aqueous solution [34].  
364 We concluded that THz irradiation accelerates the elongation process because the actin  
365 filaments undergo additional elongation under THz irradiation in the equilibrium state. Those  
366 results showed that THz irradiation affects the dynamics of actin molecules during the  
367 elongation reaction.

368 Our previous in vitro THz irradiation experiment for the same molecule helps us  
369 understand the mechanism of in vivo THz irradiation. The observed phenomena — the  
370 inhibition of cytokinesis and formation of transverse arcs — suggest the enhancement of actin  
371 filamentation in living cells, which we also quantitatively confirmed from the fluorescence  
372 intensity of SiR-actin. In the in vitro experiment, such enhancement of actin filamentation was  
373 not due to the expression of the intra-cellular system, such as activation of cell signaling,  
374 changes of transcriptional regulations, and induction of cellular responses, but was due to the  
375 direct enhancement of the elongation reaction of the actin filament. Using actin molecules, we  
376 succeeded in elucidating the effects of THz irradiation on molecular reactions and cellular  
377 expression.

378 Actin filament is a major component of the cytoskeleton, and has crucial roles in  
379 determining cell shape, and for cell motility and division [49,50]. Moreover, the recent  
380 development of fluorescence probes has led to the revelation that nuclear actin filaments are  
381 required for transcriptional regulation, DNA repair, and gene reprogramming [51–53].  
382 Therefore, THz irradiation has potential as a novel biological tool. In fact, we discovered that  
383 the effect of THz irradiation is similar to that of jasplakinolide treatment. Jasplakinolide, a  
384 naturally occurring cyclic peptide from the marine sponge *Jaspis* sp [54], is a membrane-  
385 permeable, actin-polymerizing, and filament-stabilizing drug [55]. Jasplakinolide has a wide  
386 range of known biological functions, which include antifungal and antitumor activities [56–  
387 58]. Thus, by analogy with jasplakinolide, we suggest that THz irradiation can be used to  
388 manipulate cell functions via actin polymerization. In this study, we also demonstrated that the  
389 actin filamentation is induced by an IMPATT diode source. The IMPATT diode is small,  
390 operated at room temperature, and works with lower electrical power. Such solid-state  
391 semiconductor THz-sources are widely available for experiments with biological samples.

## 392 **Conclusions**

393 We found that THz irradiation enhances the formation and stabilization of actin  
394 assemblies in living cells. Therefore, we propose that THz irradiation can be used for the optical  
395 manipulation of cellular functions via the modulation of actin dynamics, leading to a better  
396 understanding of the function of actin.

397

## 398 **Acknowledgment**

399 We thank Adam Brotchie, PhD, from Edanz Group (<https://en-author-services.edanz.com/ac>) for editing a draft  
400 of this manuscript and helping to draft the abstract.

401

402

403

## References

404

1. Peiponen K-E, Zeitler A, Kuwata-Gonokami M. Terahertz spectroscopy and imaging. Springer; 2012.

405

2. UENO Y, AJITO K. Analytical Terahertz Spectroscopy. *Anal Sci*. 2008;24: 185–192.

406

doi:10.2116/analsci.24.185

407

3. Mittleman DM. Perspective: Terahertz science and technology. *J Appl Phys*. 2017;122: 230901.

408

doi:10.1063/1.5007683

409

4. Dean P, Valavanis A, Keeley J, Bertling K, Lim YL, Alhathloul R, et al. Terahertz imaging using quantum

410

cascade lasers—a review of systems and applications. *J Phys D Appl Phys*. 2014;47: 374008.

411

doi:10.1088/0022-3727/47/37/374008

412

5. Guillet JP, Recur B, Frederique L, Bousquet B, Canioni L, Manek-Hönniger I, et al. Review of terahertz

413

tomography techniques. *J Infrared, Millimeter, Terahertz Waves*. 2014;35: 382–411. doi:10.1007/s10762-

414

014-0057-0

415

6. Lien J, Gillian N, Karagozler ME, Amihoud P, Schwesig C, Olson E, et al. Soli: Ubiquitous gesture sensing

416

with millimeter wave radar. *ACM Trans Graph*. 2016;35: 1–19. doi:10.1145/2897824.2925953

417

7. Giordani M, Polese M, Mezzavilla M, Rangan S, Zorzi M. Toward 6G Networks: Use Cases and

418

Technologies. *IEEE Commun Mag*. 2020;58: 55–61. doi:10.1109/MCOM.001.1900411

419

8. Mourad A, Yang R, Lehne PH, De La Oliva A. A baseline roadmap for advanced wireless research beyond

420

5G. *Electron*. 2020;9: 1–14. doi:10.3390/electronics9020351

421

9. Saad W, Bennis M, Chen M. A Vision of 6G Wireless Systems: Applications, Trends, Technologies, and

422

Open Research Problems. *IEEE Netw*. 2020;34: 134–142. doi:10.1109/MNET.001.1900287

423

10. Nagatsuma T. Advances in Terahertz Communications Accelerated by Photonics Technologies.

424

OECC/PSC 2019 - 24th Optoelectron Commun Conf Conf Photonics Switch Comput 2019. 2019; 1–3.

425

doi:10.23919/PS.2019.8818026

426

11. Koenig S, Lopez-Diaz D, Antes J, Boes F, Henneberger R, Leuther A, et al. Wireless sub-THz

427

communication system with high data rate. *Nat Photonics*. 2013;7: 977–981.

428

doi:10.1038/nphoton.2013.275

429

12. O'Hara JF, Ekin S, Choi W, Song I. A Perspective on Terahertz Next-Generation Wireless

430

Communications. *Technologies*. 2019;7: 43. doi:10.3390/technologies7020043

431

13. Jamshed MA, Heliot F, Brown TWC. A Survey on Electromagnetic Risk Assessment and Evaluation

432

Mechanism for Future Wireless Communication Systems. *IEEE J Electromagn RF Microwaves Med Biol*.

433

2020;4: 24–36. doi:10.1109/JERM.2019.2917766

434

14. Leitgeb N, Auvinen A, Danker-hopfe H, Mild KH. SCENIHR ( Scientific Committee on Emerging and

435

Newly Identified Health Risks ), Potential health effects of exposure to electromagnetic fields ( EMF ),

436

Scientific Committee on Emerging and Newly Identified Health Risks SCENIHR Opinion on Potential

437

health . 2016. doi:10.2772/75635

438

15. Munzarova AF, Kozlov AS, Zelentsov EL. Effect of terahertz laser irradiation on red blood cells

439

aggregation in healthy blood. *Vestn NSU Phys Ser*. 2013;8: 117–123.

440

16. Olshevskaya JS, Kozlov AS, Petrov AK, Zapara TA, Ratushnyak AS. Cell membrane permeability under

441

the influence of terahertz (submillimeter) laser radiation. *Vestn Novosib State Univ*. 2010;5: 177–181.

442

17. Bock J, Fukuyo Y, Kang S, Lisa Phipps M, Alexandrov LB, Rasmussen KO, et al. Mammalian stem cells

443

reprogramming in response to terahertz radiation. *PLoS One*. 2010;5: 8–13.

444

doi:10.1371/journal.pone.0015806

445

18. Alexandrov BS, Rasmussen KØ, Bishop AR, Usheva A, Alexandrov LB, Chong S, et al. Non-thermal

446

effects of terahertz radiation on gene expression in mouse stem cells. *Biomed Opt Express*. 2011;2: 2679.

447

doi:10.1364/BOE.2.002679

448

19. Alexandrov BS, Lisa Phipps M, Alexandrov LB, Booshehri LG, Erat A, Zabolotny J, et al. Specificity and

449

Heterogeneity of Terahertz Radiation Effect on Gene Expression in Mouse Mesenchymal Stem Cells. *Sci*

450

*Rep*. 2013;3: 1–8. doi:10.1038/srep01184

451

20. Korenstein-Ilan A, Barbul A, Hasin P, Eliran A, Gover A, Korenstein R. Terahertz Radiation Increases

452

Genomic Instability in Human Lymphocytes. *Radiat Res*. 2008;170: 224–234. doi:10.1667/RR0944.1

453

21. Kim KT, Park J, Jo SJ, Jung S, Kwon OS, Gallerano GP, et al. High-power femtosecond-terahertz pulse

454

induces a wound response in mouse skin. *Sci Rep*. 2013;3: 1–7. doi:10.1038/srep02296

455

22. Titova L V., Ayesheshim AK, Golubov A, Fogen D, Rodriguez-Juarez R, Hegmann FA, et al. Intense THz

456

pulses cause H2AX phosphorylation and activate DNA damage response in human skin tissue. *Biomed Opt*

457

*Express*. 2013;4: 559. doi:10.1364/BOE.4.000559

458

23. Henriques FC, Moritz AR. Studies of Thermal Injury: I. The Conduction of Heat to and through Skin and

459

the Temperatures Attained Therein. A Theoretical and an Experimental Investigation. *Am J Pathol*.

460

1947;23: 530–49. Available: <http://www.ncbi.nlm.nih.gov/pubmed/19970945>

461

24. Pearce JA. Models for Thermal Damage in Tissues: Processes and Applications. *Crit Rev Biomed Eng*.

462

2010;38: 1–20. doi:10.1615/CritRevBiomedEng.v38.i1.20

- 463 25. Boreham DR, Mitchel REJM. Heat-induced thermal tolerance and radiation resistance to apoptosis in  
464 human lymphocytes. *Biochem Cell Biol.* 1997;75: 393–397. doi:10.1139/o97-077
- 465 26. Wilmink GJ, Opalenik SR, Beckham JT, Abraham AA, Nanney LB, Mahadevan-Jansen A, et al. Molecular  
466 Imaging-Assisted Optimization of Hsp70 Expression during Laser-Induced Thermal Preconditioning for  
467 Wound Repair Enhancement. *J Invest Dermatol.* 2009;129: 205–216. doi:10.1038/jid.2008.175
- 468 27. MORI E, TAKAHASHI A, OHNISHI T. The Biology of Heat-induced DNA Double-Strand Breaks.  
469 *Therm Med.* 2008;24: 39–50. doi:10.3191/thermalmed.24.39
- 470 28. Roti Roti JL, Pandita RK, Mueller JD, Novak P, Moros EG, Laszlo A. Severe, short-duration (0–3 min)  
471 heat shocks (50–52°C) inhibit the repair of DNA damage. *Int J Hyperth.* 2010;26: 67–78.  
472 doi:10.3109/02656730903417947
- 473 29. Habauzit D, Le Quément C, Zhadobov M, Martin C, Aubry M, Sauleau R, et al. Transcriptome Analysis  
474 Reveals the Contribution of Thermal and the Specific Effects in Cellular Response to Millimeter Wave  
475 Exposure. Scarfi MR, editor. *PLoS One.* 2014;9: e109435. doi:10.1371/journal.pone.0109435
- 476 30. Romanenko S, Harvey AR, Hool L, Fan S, Wallace VP. Millimeter Wave Radiation Activates Leech  
477 Nociceptors via TRPV1-Like Receptor Sensitization. *Biophys J.* 2019;116: 2331–2345.  
478 doi:10.1016/j.bpj.2019.04.021
- 479 31. Tsubouchi M, Hoshina H, Nagai M, Ioyama G. Plane photoacoustic wave generation in liquid water using  
480 irradiation of terahertz pulses. *Sci Rep.* 2020;10: 18537. doi:10.1038/s41598-020-75337-6
- 481 32. Yamazaki S, Harata M, Ueno Y, Tsubouchi M, Konagaya K, Ogawa Y, et al. Propagation of THz  
482 irradiation energy through aqueous layers: Demolition of actin filaments in living cells. *Sci Rep.* 2020;10:  
483 1–10. doi:10.1038/s41598-020-65955-5
- 484 33. Idehara T, Tatematsu Y, Yamaguchi Y, Khutoryan EM, Kuleshov AN, Ueda K, et al. The development of  
485 460 GHz gyrotrons for 700 MHz DNP-NMR spectroscopy. *J Infrared, Millimeter, Terahertz Waves.*  
486 2015;36: 613–627.
- 487 34. Yamazaki S, Harata M, Idehara T, Konagaya K, Yokoyama G, Hoshina H, et al. Actin polymerization is  
488 activated by terahertz irradiation. *Sci Rep.* 2018;8. doi:10.1038/s41598-018-28245-9
- 489 35. Milo R, Phillips R. *Cell Biology by the Numbers.* Garland Science; 2015. doi:10.1201/9780429258770
- 490 36. Bezanilla M, Gladfelter AS, Kovar DR, Lee WL. Cytoskeletal dynamics: A view from the membrane. *J*  
491 *Cell Biol.* 2015;209: 329–337. doi:10.1083/jcb.201502062
- 492 37. D'Este E, Hell SW, Waldmann H, Göttfert F, Gerlich DW, Masharina A, et al. Fluorogenic probes for live-  
493 cell imaging of the cytoskeleton. *Nat Methods.* 2014;11: 731–733. doi:10.1038/nmeth.2972
- 494 38. Pelham RJ, Chang F. Actin dynamics in the contractile ring during cytokinesis in fission yeast. *Nature.*  
495 2002;419: 82–86. doi:10.1038/nature00999
- 496 39. Group CB. Single Particle Tracking of Surface Receptor. 1994;127: 963–971.
- 497 40. O'Connell CB, Warner AK, Wang Y li. Distinct roles of the equatorial and polar cortices in the cleavage of  
498 adherent cells. *Curr Biol.* 2001;11: 702–707. doi:10.1016/S0960-9822(01)00181-6
- 499 41. Murthy K, Wadsworth P. Myosin-II-Dependent Localization and Dynamics of F-Actin during Cytokinesis.  
500 2005;15: 724–731. doi:10.1016/j.cub.2005.02.055
- 501 42. Mendes Pinto I, Rubinstein B, Kucharavy A, Unruh JR, Li R. Actin Depolymerization Drives Actomyosin  
502 Ring Contraction during Budding Yeast Cytokinesis. *Dev Cell.* 2012;22: 1247–1260.  
503 doi:10.1016/j.devcel.2012.04.015
- 504 43. Vallenius T. Actin stress fibre subtypes in mesenchymal-migrating cells. *Open Biol.* 2013;3.  
505 doi:10.1098/rsob.130001
- 506 44. Altankov G, Grinneu F. Depletion of Intracellular Potassium Disrupts Coated Pits and Reversibly Inhibits  
507 Cell Polarization During Fibroblast Spreading. 1993;120.
- 508 45. KAWAMURA M, MARUYAMA K. A Further Study of Electron Microscopic Particle Length of F-Actin  
509 Polymerized *in Vitro.* *J Biochem.* 1972;72: 179–188.
- 510 46. Yamamoto N, Ohta K, Tamura A, Tominaga K. Broadband Dielectric Spectroscopy on Lysozyme in the  
511 Sub-Gigahertz to Terahertz Frequency Regions: Effects of Hydration and Thermal Excitation. *J Phys Chem*  
512 *B.* 2016;120: 4743–4755. doi:10.1021/acs.jpcc.6b01491
- 513 47. Xu Y, Havenith M. Perspective: Watching low-frequency vibrations of water in biomolecular recognition  
514 by THz spectroscopy. *J Chem Phys.* 2015;143: 170901. doi:10.1063/1.4934504
- 515 48. Conti Nibali V, Havenith M. New Insights into the Role of Water in Biological Function: Studying  
516 Solvated Biomolecules Using Terahertz Absorption Spectroscopy in Conjunction with Molecular  
517 Dynamics Simulations. *J Am Chem Soc.* 2014;136: 12800–12807. doi:10.1021/ja504441h
- 518 49. Pollard TD, Cooper JA. Actin, a central player in cell shape and movement. *Science.* 2009;326: 1208–  
519 1212. doi:10.1126/science.1175862
- 520 50. Small JV, Rottner K, Kaverina I, Anderson KI. Assembling an actin cytoskeleton for cell attachment and  
521 movement. *Biochim Biophys Acta - Mol Cell Res.* 1998;1404: 271–281. doi:10.1016/S0167-  
522 4889(98)00080-9
- 523 51. Yamazaki S, Yamamoto K, de Lanerolle P, Harata M. Nuclear F-actin enhances the transcriptional activity  
524 of  $\beta$ -catenin by increasing its nuclear localization and binding to chromatin. *Histochem Cell Biol.*  
525 2016;145: 389–399. doi:10.1007/s00418-016-1416-9
- 526 52. Caridi CP, Plessner M, Grosse R, Chiolo I. Nuclear actin filaments in DNA repair dynamics. *Nat Cell Biol.*  
527 2019;21: 1068–1077. doi:10.1038/s41556-019-0379-1

- 528  
529  
530  
531  
532  
533  
534  
535  
536  
537  
538  
539  
540  
541  
542  
543  
544  
545
53. Miyamoto K, Pasque V, Jullien J, Gurdon JB. Nuclear actin polymerization is required for transcriptional reprogramming of Oct4 by oocytes. *Genes Dev.* 2011;25: 946–958. doi:10.1101/gad.615211
  54. White KN, Tenney K, Crews P. The Bengamides: A Mini-Review of Natural Sources, Analogues, Biological Properties, Biosynthetic Origins, and Future Prospects. *J Nat Prod.* 2017;80: 740–755. doi:10.1021/acs.jnatprod.6b00970
  55. Bubb MR, Senderowicz AMJ, Sausville EA, Duncan KKL, Korn ED. Jasplakinolide, a cytotoxic natural product, induces actin polymerization and competitively inhibits the binding of phalloidin to F-actin. *J Biol Chem.* 1994;269: 14869–14871.
  56. Scott VR, Boehme R, Matthews TR. New class of antifungal agents: Jasplakinolide, a cyclodepsipeptide from the marine sponge, *Jaspis* species. *Antimicrob Agents Chemother.* 1988;32: 1154–1157. doi:10.1128/AAC.32.8.1154
  57. Stingl J, Andersen RJ, Emerman JT. In vitro screening of crude extracts and pure metabolites obtained from marine invertebrates for the treatment of breast cancer. *Cancer Chemother Pharmacol.* 1992;30: 401–406. doi:10.1007/BF00689969
  58. Senderowicz AM, Kaur G, Sainz E, Laing C, Inman WD, Rodríguez J, et al. Jasplakinolide's inhibition of the growth of prostate carcinoma cells in vitro with disruption of the actin cytoskeleton. *J Natl Cancer Inst.* 1995;87: 46–51. doi:10.1093/jnci/87.1.46

## Supporting information

546  
547  
548  
549  
550  
551

**S1 Fig. Temperature change of the sample due to THz irradiation.**

**S2 Fig. Morphological analysis of cells.**

**S3 Fig. Morphological analysis of cells.**

**S1 Movie. Live-cell imaging of actin filaments with THz irradiation.**
